# Supplementary material
Source: ML conference proceedings conference paper supplement (https://openreview.net/forum?id=qNNjudaNhb)
Supplement: supplementary_material [file code.pdf › code.pdf]

The code is available at <https://anonymous.4open.science/r/Oh-Defense-ADB6>.
